# Supplementary material
Source: PubMed Central journal article supplement (PMC8592003)
Supplement: i1551-6776-26-8-802_s01.pdf [file i1551-6776-26-8-802_s01.pdf]

**Table S1. MALDI-TOF MS Sepsityper Organism Validation Timeline**

| Validation Date                 | Organisms Validated                                     | Alternative Reporting Name, If Applicable                    |
|---------------------------------|---------------------------------------------------------|--------------------------------------------------------------|
| August 2019                     | <i>Enterobacter cloacae</i> complex                     |                                                              |
|                                 | <i>Enterococcus faecalis</i>                            |                                                              |
|                                 | <i>Enterococcus faecium</i>                             |                                                              |
|                                 | <i>Escherichia coli</i>                                 |                                                              |
|                                 | <i>Klebsiella pneumoniae</i>                            |                                                              |
|                                 | <i>Klebsiella oxytoca</i>                               | <i>Klebsiella</i> species                                    |
|                                 | <i>Morganella morganii</i>                              |                                                              |
|                                 | <i>Proteus mirabilis</i>                                |                                                              |
|                                 | <i>Serratia marcescens</i>                              |                                                              |
|                                 | <i>Staphylococcus aureus</i>                            |                                                              |
|                                 | <i>Staphylococcus capitis</i>                           | <i>Staphylococcus</i> not <i>aureus</i> from Sepsityper      |
|                                 | <i>Staphylococcus epidermidis</i>                       |                                                              |
|                                 | <i>Staphylococcus hominis</i>                           |                                                              |
|                                 | <i>Staphylococcus warneri</i>                           |                                                              |
|                                 | <i>Streptococcus agalactiae</i> (Group B Streptococcus) |                                                              |
|                                 | <i>Streptococcus anginosus</i>                          | Presumptive <i>Streptococcus viridans</i> from Sepsityper    |
|                                 | <i>Streptococcus mitis/oralis</i>                       |                                                              |
| <i>Streptococcus pneumoniae</i> |                                                         |                                                              |
| <i>Streptococcus salivarius</i> |                                                         |                                                              |
| <i>Viridans Streptococcus</i>   |                                                         |                                                              |
| January 2020                    | <i>Bacillus cereus</i>                                  | <i>Bacillus</i> species not <i>anthracis</i> from Sepsityper |
|                                 | <i>Bacillus megaterium</i>                              |                                                              |
|                                 | <i>Bacillus</i> species, not <i>anthracis</i>           |                                                              |
|                                 | <i>Kocuria (Micrococcus luteus) rhizophila</i>          |                                                              |

MALDI-TOF MS, matrix-assisted laser desorption/ionization time-of-flight mass spectrometry
