# Supplementary material
Source: PubMed Central journal article supplement (PMC8592003)
Supplement: i1551-6776-26-8-802_s02.pdf [file i1551-6776-26-8-802_s02.pdf]

**Table S2.** Time to Organism Identification From Gram Stain (hr)

| Organism Identified                            | Pre-implementation<br>(n = 68) | Post-implementation<br>(n = 69) | p value |
|------------------------------------------------|--------------------------------|---------------------------------|---------|
| Gram-positive organisms, median (IQR)          |                                |                                 |         |
| Coagulase-negative staphylococcus              | 31.4 (23.7–36.1)               | 20.7 (6–25.7)                   | 0.005*  |
| <i>Staphylococcus aureus</i>                   | 25.8 (22.2–31)                 | 27.7 (7.8–33.1)                 | 0.97    |
| <i>Streptococcus</i> species                   | 27.1 (22.7–30.2)               | 8.23 (4.6–17.1)                 | 0.01*   |
| <i>Kocuria (Micrococcus luteus) rhizophila</i> | 26.3                           | 2.3(2–5)                        | NA      |
| Other Gram-positive organisms                  | 21.9 (19.9–22.7)               | 22.6 (14–31.2)                  | NA      |
| Gram-negative organisms, median (IQR)          |                                |                                 |         |
| <i>Escherichia coli</i>                        | 19.8 (17.9–29)                 | 5.5 (3–7.4)                     | 0.02*   |
| <i>Enterobacter cloacae</i> complex            | 27.9 (21.7–28.8)               | NA                              | NA      |
| <i>Klebsiella</i> species                      | 27.7 (25.4–29.7)               | 6.5 (5.8–7.1)                   | NA      |
| Other Gram-negative organisms                  | 23.5 (19.8–26.7)               | 10.1(5.5–24.4)                  | 0.23    |

NA, not applicable

\* < 0.05, considered significant.
